# Supplementary material
Source: publisher figshare collection journal article supplement (https://springernature.figshare.com/ndownloader/files/21929151)
Supplement: Supplementary file [file 21929151]

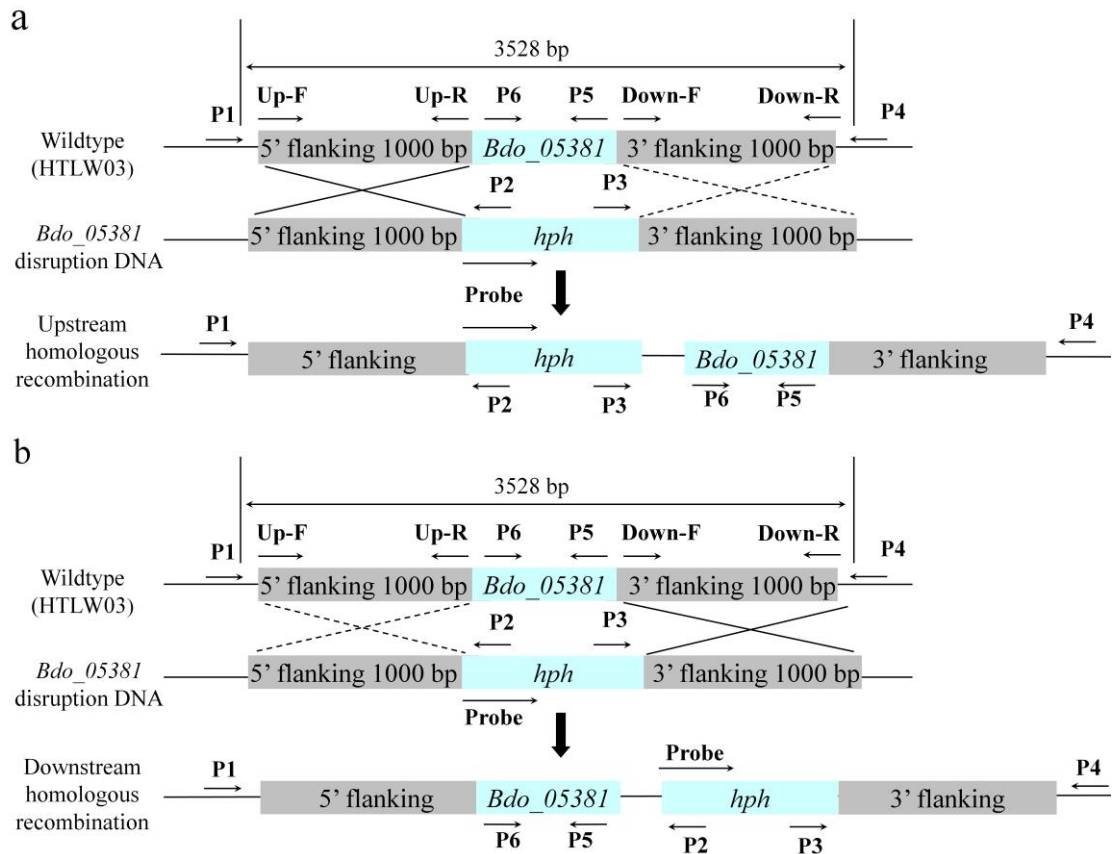

**Fig. S1** Predicted PCR products when the homologous recombination occurred only with the upstream or downstream fragment

Solid lines represent the homologous recombination, whereas dashed lines indicate a lack of homologous recombination. **a** Homologous recombination involving the upstream fragment. **b** Homologous recombination involving the downstream fragment.
